# Supplementary material for: Crosstalk between Metabolic Alterations and Altered Redox Balance in PTC-Derived Cell Lines
Source: MDPI journal article supplement (doi:10.3390/metabo9020023), 2019-02-01
Supplement: s1 [file s1]

## Supplementary Files

**Table 1.** Holm-Bonferroni sequential correction of p values obtained from unpaired Student T-test.

| <b>Compound</b>            | <b>TPC-1 vs. Nthy-ori3-1</b> | <b>K1 vs. Nthy-ori3-1</b> | <b>B-CPAP vs. Nthy-ori3-1</b> |
|----------------------------|------------------------------|---------------------------|-------------------------------|
| <i>Glucose</i>             | 0.0579                       | NS                        | NS                            |
| <i>F6P</i>                 | 0.0064                       | NS                        | 0.0015                        |
| <i>F1,6P</i>               | 0.0294                       | NS                        | NS                            |
| <i>GAP</i>                 | 0.0294                       | 0.0024                    | 0.0015                        |
| <i>DHAP</i>                | NS                           | NS                        | NS                            |
| <i>2-PG/3-PG</i>           | 0.0018                       | 0.0015                    | 0.0144                        |
| <i>PEP</i>                 | 0.0011                       | 0.0015                    | 0.0015                        |
| <i>Pyruvic acid</i>        | 0.0224                       | 0.011                     | NS                            |
| <i>Lactic acid</i>         | NS                           | NS                        | NS                            |
| <i>Acetyl-CoA</i>          | 0.0579                       | NS                        | 0.0196                        |
| <i>Citrate</i>             | NS                           | NS                        | 0.013                         |
| <i>Isocitrate</i>          | NS                           | NS                        | 0.016                         |
| <i>α-ketoglutaric acid</i> | 0.0294                       | 0.0304                    | 0.0033                        |
| <i>Succinyl CoA</i>        | 0.0579                       | NS                        | NS                            |
| <i>Succinic acid</i>       | NS                           | 0.0261                    | NS                            |
| <i>Fumaric acid</i>        | NS                           | 0.012                     | 0.0425                        |
| <i>Malic acid</i>          | NS                           | NS                        | NS                            |
| <i>Oxaloacetic acid</i>    | 0.0579                       | NS                        | 0.0324                        |
| <i>Glutamine</i>           | 0.0011                       | 0.0015                    | 0.0024                        |
| <i>Glutamate</i>           | NS                           | 0.0304                    | NS                            |
